# Supplementary material
Source: PubMed Central journal article supplement (PMC6684002)
Supplement: MMBR.00062-18-s0003.pdf [file MMBR.00062-18-s0003.pdf]

# Deciphering within-host microevolution of *Mycobacterium tuberculosis* through whole genome sequencing: the phenotypic impact and way forward

Ley SD<sup>a</sup>, de Vos M<sup>a</sup>, Van Rie A<sup>b\*</sup>, Warren RM<sup>a\*#</sup>

<sup>a</sup> DST-NRF Centre of Excellence for Biomedical Tuberculosis Research; South African Medical Research Council Centre for Tuberculosis Research; Division of Molecular Biology and Human Genetics, Faculty of Medicine and Health Sciences, Stellenbosch University, Cape Town.

<sup>b</sup>Department of Epidemiology and Social Medicine, Faculty of Medicine and Health Sciences, University of Antwerp, Belgium

# corresponding author: [rw1@sun.ac.za](mailto:rw1@sun.ac.za)

\* shared senior last authors

## **SUPPLEMENTAL MATERIAL**

**Dataset S1:** Patient and isolate data extracted from the included publications

*see separate file*

**Dataset S2:** Comparison of genes found to micro-evolve within the host

*see separate file*

**Table S1:** Search strategy and electronic databases screened

| <b>07.08.2018</b>                       | <b>PubMed</b>                                                                                                                                           | <b>No. of hits</b> |
|-----------------------------------------|---------------------------------------------------------------------------------------------------------------------------------------------------------|--------------------|
| search order/strategy                   |                                                                                                                                                         |                    |
| (DP = 2010 - present)<br>AND            | tuberculosis[MeSH terms] OR tuberculosis OR TB OR mycobacterium<br>tuberculosis[MeSH terms] OR mycobacterium tuberculosis OR Mtb OR M.<br>tuberculosis  | 69044              |
| 1 AND                                   | ((full genome OR complete genome OR entire genome OR next generation OR whole<br>genome OR deep OR genome) AND (sequenc*)) OR NGS OR WGS                | 2203               |
| 1 AND 2 AND                             | within-host OR within host OR within patient OR within-patient OR intra patient OR<br>intra-patient OR in patient OR single patient OR during treatment | 1043               |
| NOT PT= review AND<br>1 AND 2 AND 3 AND | serial* OR consecutive OR multiple OR several OR follow up OR emerg* OR<br>acquired OR acquisition                                                      | 314                |

| <b>07.08.2018</b>     | <b>Web of Science Core Collection [v 5.29]</b>                                                                                                          | <b>No. of hits</b> |
|-----------------------|---------------------------------------------------------------------------------------------------------------------------------------------------------|--------------------|
| search order/strategy | For all searches only hits published between 2010 - 2018 included                                                                                       |                    |
| 1                     | tuberculosis[MeSH terms] OR tuberculosis OR TB OR mycobacterium<br>tuberculosis[MeSH terms] OR mycobacterium tuberculosis OR Mtb OR M.<br>tuberculosis  | 84340              |
| within 1              | ((full genome OR complete genome OR entire genome OR next generation OR whole<br>genome OR deep OR genome) AND (sequenc*)) OR NGS OR WGS                | 2056               |
| within 1 AND 2        | within-host OR within host OR within patient OR within-patient OR intra patient OR<br>intra-patient OR in patient OR single patient OR during treatment | 437                |
| within 1 AND 2 AND 3  | serial* OR consecutive OR multiple OR several OR follow up OR emerg* OR<br>acquired OR acquisition                                                      | 210                |

| <b>07.08.2018</b>          | <b>Scopus</b>                                                                                                                                        | <b>No. of hits</b> |
|----------------------------|------------------------------------------------------------------------------------------------------------------------------------------------------|--------------------|
| search order/strategy      | For all searches only hits published between 2010 - 2018 included                                                                                    |                    |
| 1                          | tuberculosis OR TB OR mycobacterium tuberculosis OR Mtb OR M. tuberculosis                                                                           | 198833             |
| within 1                   | ((full genome OR complete genome OR entire genome OR next generation OR whole genome OR deep OR genome) AND (sequenc*)) OR NGS OR WGS                | 10267              |
| within 1 AND 2             | within-host OR within host OR within patient OR within-patient OR intra patient OR intra-patient OR in patient OR single patient OR during treatment | 128                |
| within 1 AND 2 AND 3       | serial* OR consecutive OR multiple OR several OR follow up OR emerg* OR acquired OR acquisition                                                      | 89                 |
| within 1 AND 2 AND 3 AND 4 | EXCLUDE publication type = review                                                                                                                    | 63                 |

| <b>07.08.2018</b>     | <b>MEDLINE</b>                                                                                                                                       | <b>No. of hits</b> |
|-----------------------|------------------------------------------------------------------------------------------------------------------------------------------------------|--------------------|
| search order/strategy | For all searches only hits published between 2010-2018 (DP) included and publication type = review excluded                                          |                    |
| 1                     | tuberculosis[MeSH terms] OR tuberculosis OR TB OR mycobacterium tuberculosis[MeSH terms] OR mycobacterium tuberculosis OR Mtb OR M. tuberculosis     | 78711              |
| 1 AND                 | ((full genome OR complete genome OR entire genome OR next generation OR whole genome OR deep OR genome) AND (sequenc*)) OR NGS OR WGS                | 1873               |
| 1 AND 2 AND           | within-host OR within host OR within patient OR within-patient OR intra patient OR intra-patient OR in patient OR single patient OR during treatment | 231                |
| 1 AND 2 AND 3 AND     | serial* OR consecutive OR multiple OR several OR follow up OR emerg* OR acquired OR acquisition                                                      | 117                |

| 07.08.2018            | CINAHL                                                                                                                                               | No. of hits |
|-----------------------|------------------------------------------------------------------------------------------------------------------------------------------------------|-------------|
| search order/strategy | For all searches only hits published between 2010 - 2018 (DT) included and publication type = review excluded                                        |             |
| 1                     | tuberculosis[MeSH terms] OR tuberculosis OR TB OR mycobacterium tuberculosis[MeSH terms] OR mycobacterium tuberculosis OR Mtb OR M. tuberculosis     | 5271        |
| 1 AND                 | ((full genome OR complete genome OR entire genome OR next generation OR whole genome OR deep OR genome) AND (sequenc*)) OR NGS OR WGS                | 24          |
| 1 AND 2 AND           | within-host OR within host OR within patient OR within-patient OR intra patient OR intra-patient OR in patient OR single patient OR during treatment | 9           |
| 1 AND 2 AND 3 AND     | serial* OR consecutive OR multiple OR several OR follow up OR emerg* OR acquired OR acquisition                                                      | 6           |

**Table S2:** Inclusion and exclusion criteria for the comparison of micro-evolved loci between studies

|    | <b>Author &amp; Reference</b>     | <b>Included in gene analysis (yes/no)</b> | <b>Data set used</b>                                                      | <b>Reason for exclusion</b>                                                                                                                                                                                     |
|----|-----------------------------------|-------------------------------------------|---------------------------------------------------------------------------|-----------------------------------------------------------------------------------------------------------------------------------------------------------------------------------------------------------------|
| 1  | Saunders <i>et al</i> (1)         | yes                                       | SNVs within article                                                       |                                                                                                                                                                                                                 |
| 2  | Comas <i>et al</i> (2)            | yes                                       | Suppl. Table 2                                                            | SNVs from <i>in vitro</i> single colonies excluded (see inclusion criteria)                                                                                                                                     |
| 3  | Walker <i>et al</i> (3)           | no                                        |                                                                           | SNVs between serial isolates not described                                                                                                                                                                      |
| 4  | Sun <i>et al</i> (4)              | yes                                       | Table S2                                                                  |                                                                                                                                                                                                                 |
| 5  | Farhat <i>et al</i> (5)           | yes                                       | Suppl. Table 17; IDs 6 - 13                                               |                                                                                                                                                                                                                 |
| 6  | Bryant <i>et al</i> (6)           | yes                                       | Suppl. Table 1                                                            |                                                                                                                                                                                                                 |
| 7  | Clark <i>et al</i> (7)            | no                                        |                                                                           | SNVs could not be assigned to specific isolates, so unclear which ones are from serials and which ones from non-serial isolates                                                                                 |
| 8  | Merker <i>et al</i> (8)           | yes                                       | Yellow highlighted genes in Table S1 (Patient A) and Table S3 (Patient B) | Table S5 (Patient C) excluded as exogenous re-infection, not within-patient microevolution                                                                                                                      |
| 9  | Pérez-Lago <i>et al</i> (9)       | no                                        |                                                                           | Only nucleotide change indicated, but no gene name or loci (Table 2). Within main text only 2 genes mentioned.                                                                                                  |
| 10 | Eldholm <i>et al</i> (10)         | yes                                       | Suppl. Table 13059_2014_490_MOESM1_ESM.xlsx                               |                                                                                                                                                                                                                 |
| 11 | Guerra-Assunção <i>et al</i> (11) | no                                        |                                                                           | Suppl. Tables indicate relapse associated SNVs, but these are not necessarily all SNVs detected between pairs. Data not assignable to specific isolate (i.e. gain/loss, present in both isolates of a patient?) |
| 12 | Witney <i>et al</i> (12)          | yes                                       | Table A1; only data of Case 2                                             | Complete set of SNVs between paired isolates only given for Case 2; no heterozygous SNVs though...                                                                                                              |
| 13 | Guerra-Assunção <i>et al</i> (13) | no                                        |                                                                           | Same data than Guerra-Assunção <i>et al</i> (11)                                                                                                                                                                |
| 14 | Black <i>et al</i> (14)           | yes                                       | Table 5                                                                   | SNV between <i>in vitro</i> grown single colonies excluded (see inclusion criteria)                                                                                                                             |
| 15 | O'Neill <i>et al</i> (15)         | no                                        |                                                                           | Meta-analysis of data sets of Merker <i>et al</i> , Sun <i>et al</i> and Eldholm <i>et al</i> (4, 8, 10)                                                                                                        |
| 16 | Stinear <i>et al</i> (16)         | yes                                       | Suppl. Table 1                                                            |                                                                                                                                                                                                                 |
| 17 | Pérez-Lago <i>et al</i> (17)      | no                                        |                                                                           | No high confidence SNVs detected between serial isolates                                                                                                                                                        |
| 18 | Bloemberg <i>et al</i> (18)       | no                                        |                                                                           | Drug resistance-conferring mutations only                                                                                                                                                                       |
| 19 | Liu <i>et al</i> (19)             | yes                                       | Suppl. Table S1 B                                                         | Suppl. Table S1 A excluded, as these SNVs did not appear <i>de novo</i> or disappear completely over time (see inclusion criteria)                                                                              |
| 20 | Silva Feliciano <i>et al</i> (20) | no                                        |                                                                           | Only a sub-set of drug resistance-conferring mutations analyzed and reported; unclear if these are all SNVs detected or not.                                                                                    |

|    | <b>Author &amp; Reference</b> | <b>Included in gene analysis (yes/no)</b> | <b>Data set used</b>                                                | <b>Reason for exclusion</b>                                                                                                                                                    |
|----|-------------------------------|-------------------------------------------|---------------------------------------------------------------------|--------------------------------------------------------------------------------------------------------------------------------------------------------------------------------|
| 21 | Korhonen <i>et al</i> (21)    | yes                                       | Suppl. Table                                                        | Not ALL SNVs compared to reference reported, but all <i>de novo</i> emerged or disappeared SNVs reported                                                                       |
| 22 | Faksri <i>et al</i> (22)      | yes                                       | SNVs described in main text                                         |                                                                                                                                                                                |
| 23 | Ssengooba <i>et al</i> (23)   | yes                                       | additional file 2                                                   | Parallel isolates (sputum and blood)                                                                                                                                           |
| 24 | Zhang <i>et al</i> (24)       | no                                        |                                                                     | Only SNVs in the genes <i>gyrA</i> and <i>gyrB</i> reported                                                                                                                    |
| 25 | Casali <i>et al</i> (25)      | no                                        |                                                                     | Only drug resistance-conferring and compensatory mutations indicated, but no other SNVs between serial isolates                                                                |
| 26 | Lieberman <i>et al</i> (26)   | yes                                       |                                                                     | Parallel isolates across several anatomical sites                                                                                                                              |
| 27 | Wollenberg <i>et al</i> (27)  | no                                        |                                                                     | Drug resistance-conferring mutations only                                                                                                                                      |
| 28 | Datta <i>et al</i> (28)       | yes                                       | Suppl.Tables 2, 3 and 4                                             |                                                                                                                                                                                |
| 29 | Manson <i>et al</i> (29)      | no                                        |                                                                     | Drug resistance-conferring mutations only                                                                                                                                      |
| 30 | Dheda <i>et al</i> (30)       | no                                        |                                                                     | No SNVs reported                                                                                                                                                               |
| 31 | Witney <i>et al</i> (31)      | yes                                       | Table 4                                                             |                                                                                                                                                                                |
| 32 | Trauner <i>et al</i> (32)     | yes                                       | Additional File 3_v-SNPs                                            | SNVs present at all timepoints of a patient were excluded (see inclusion criteria)                                                                                             |
| 33 | Navarro <i>et al</i> (33)     | yes                                       | Table 1                                                             | SNVs from <i>in vitro</i> single colonies excluded (see inclusion criteria)                                                                                                    |
| 34 | Nsofor <i>et al</i> (34)      | no                                        |                                                                     | Drug resistance-conferring mutations only                                                                                                                                      |
| 35 | Senghore <i>et al</i> (35)    | no                                        |                                                                     | Drug resistance-conferring mutations and compensatory mutations only                                                                                                           |
| 36 | Leung <i>et al</i> (36)       | yes                                       | Table 5                                                             | Only Sanger sequencing confirmed SNVs included                                                                                                                                 |
| 37 | Herranz <i>et al</i> (37)     | yes                                       | Supplementary table 1                                               |                                                                                                                                                                                |
| 38 | Dheda <i>et al</i> (38)       | yes                                       | Suppl. Table e6: SNPs gained at t= 1<br>All new non-synonymous SNPs | SNPs not assignable to specific patient, but as all patients have parallel/serial isolates, and reported SNPs are all SNPs gained during treatment, still included in analysis |

**Table S3:** Sequencing methods and analysis parameters of each study

| Study | Sequencing Platform                           | Average Depth (range)                         | Read length                                                                             | Sequencing Type | Reference strain (Accession Number)                                         | Aligner                               | Variant caller                        | Min. coverage (at specific site) | Hetero-frequency cut-off (%) | Genomic regions excluded from analysis                                                                                                                | Visual/manual inspection of sequences (yes/no) | Validation by Sanger /targeted PCR (yes/no) | Additional (non-WGS based) genotyping methods used |
|-------|-----------------------------------------------|-----------------------------------------------|-----------------------------------------------------------------------------------------|-----------------|-----------------------------------------------------------------------------|---------------------------------------|---------------------------------------|----------------------------------|------------------------------|-------------------------------------------------------------------------------------------------------------------------------------------------------|------------------------------------------------|---------------------------------------------|----------------------------------------------------|
| (1)   | Illumina Solexa                               | 60-100x                                       | 50bp                                                                                    | paired-end      | <i>De novo</i> assembly of pooled data from 3 clinical strains investigated | Velvet                                | Mapping & Assembly with Quality (MAQ) | <i>not indicated</i>             | <i>not indicated</i>         | transposable & repetitive elements                                                                                                                    | no                                             | no                                          | RFLP, 15-locus MIRU-VNTR                           |
| (2)   | Illumina                                      | 302x (77 - 512x)                              | 76bp                                                                                    | paired-end      | Common ancestor                                                             | Mapping & Assembly with Quality (MAQ) | Mapping & Assembly with Quality (MAQ) | 5                                | 100                          | mobile genetic elements, PE/PPE, PE-PGRS, heterozygous calls                                                                                          | no                                             | no                                          | <i>none</i>                                        |
| (3)   | Illumina HiSeq                                | 88.5x                                         | 75bp                                                                                    | paired-end      | H37Rv (NC000962.2)                                                          | Stampy                                | SAMtools                              | 5                                | 75                           | repetitive regions, SNVs within 12bp of another SNV                                                                                                   | no                                             | no                                          | 24-loci MIRU-VNTR                                  |
| (4)   | Illumina HiSeq 1000 & Illumina GenomeAnalyzer | 55-269x                                       | 115bp + 95bp                                                                            | paired-end      | H37Rv (AL123456) CCDC5079 (CP001641)                                        | BWA                                   | SAMtools                              | <i>not indicated</i>             | 5                            | mobile genetic elements, indels, PE/PPE, PE-PGRS                                                                                                      | no                                             | no                                          | <i>none</i>                                        |
| (5)   | Illumina Genome Analyser Ix                   | <i>not attributable to individual isolate</i> | <b>P1:</b> <i>not indicated</i><br><b>P2,4,5,10:</b> 50bp<br><b>P2,6,8:</b> 35bp + 75bp | single-end      | H37Rv                                                                       | MAQ v0.6.6                            | MAQ                                   | 20                               | <i>not indicated</i>         | SNVs within 5bp indels or adjacent consensus quality of <20. Reads aligning with >3 mismatches in the first 24bp and those aligning to multiple loci. | no                                             | no                                          | 24-loci MIRU-VNTR, spoligotyping                   |
| (6)   | Illumina HiSeq                                | 120x                                          | 100bp                                                                                   | paired-end      | corrected H37Rv                                                             | SMALT                                 | SAMtools & BCFtools                   | 4                                | 5                            | SNVs within 200bp of other heterozygous sites                                                                                                         | yes                                            | no                                          | 24-loci MIRU-VNTR                                  |
| (7)   | Illumina HiSeq 2000                           | 314x                                          | 76bp                                                                                    | paired-end      | corrected H37Rv                                                             | BWA                                   | SAMtools & BCFtools                   | 10                               | <i>not indicated</i>         | PE/PPE/PGRS                                                                                                                                           | no                                             | no                                          | <i>none</i>                                        |
| (8)   | Illumina                                      | <i>not available for whole genome</i>         | 72 and 46bp                                                                             | paired-end      | H37Rv (NC_000962.2)                                                         | SARUMAN                               | In-house perl script                  | 10                               | 75                           | high GC content regions, PE/PPE/PGRS gene families, ESAT-6 like, <i>lppA</i> , <i>lppB</i> , <i>pks12</i>                                             | no                                             | yes                                         | Sanger sequencing                                  |
| (9)   | Illumina HiSeq                                | 473.34x (105.3 - 3885.9x)                     | 51-101bp                                                                                | paired-end      | Common ancestor ( <i>Comas et al</i> )                                      | BWA and MAQ                           | SAMtools                              | 10                               | <i>not indicated</i>         | positions with only heterozygous calls in all patients                                                                                                | no                                             | yes                                         | 24-loci MIRU-VNTR, RFLP                            |
| (10)  | Illumina HiSeq & MiSeq                        | 210x                                          | 50-150bp                                                                                | paired-end      | H37Rv                                                                       | SeqMan Ngen                           | SeqMan Pro                            | 50                               | 4                            | repetitive sequences and SNVs with distance <10                                                                                                       | no                                             | yes "verified by mutation-specific PCR"     | 24-loci MIRU-VNTR, RFLP                            |

| Study | Sequencing Platform                           | Average Depth (range)    | Read length          | Sequencing Type      | Reference strain (Accession Number)        | Aligner               | Variant caller    | Min. coverage (at specific site) | Hetero-frequency cut-off (%)                                 | Genomic regions excluded from analysis                                  | Visual/manual inspection of sequences (yes/no) | Validation by Sanger /targeted PCR (yes/no) | Additional (non-WGS based) genotyping methods used |
|-------|-----------------------------------------------|--------------------------|----------------------|----------------------|--------------------------------------------|-----------------------|-------------------|----------------------------------|--------------------------------------------------------------|-------------------------------------------------------------------------|------------------------------------------------|---------------------------------------------|----------------------------------------------------|
| (11)  | Illumina HiSeq 2000                           | 88x (median) 127x (mean) | 100bp                | paired-end           | H37Rv (AL123456.3)                         | BWA-mem               | SAMtools          | 20                               | 75                                                           | highly repetitive and variable regions (e.g. PE/PPE)                    | no                                             | no                                          | Spoligotyping, RFLP                                |
| (12)  | Ion Torrent personal genome machine (Ion PGM) | maximum 200x             | 200bp                | <i>not indicated</i> | H37Rv (NC_000962.3)                        | TMAP                  | SAMtools          | 4                                | 75 or 100 ( <i>unclear formulation</i> )                     | heterozygous loci                                                       | no                                             | no                                          | <i>none</i>                                        |
| (13)  | Illumina HiSeq 2000                           | 88x (median) 127x (mean) | 100bp                | paired-end           | H37Rv (AL123456.3)                         | BWA-mem               | SAMtools          | 20                               | 75                                                           | highly repetitive and variable regions (e.g. PE/PPE)                    | no                                             | no                                          | Spoligotyping, RFLP                                |
| (14)  | Illumina HiSeq 2000                           | 137                      | 100bp                | paired-end           | H37Rv (AL123456)                           | BWA, Novoalign, SMALT | GATK              | 50                               | 30                                                           | mobile genetic elements, repetitive regions, PE/PPE, PE-PGRS            | yes                                            | yes                                         | Sanger sequencing, spoligotyping                   |
| (15)  | Illumina HiSeq                                | 96 - 192x                | min 35bp             | paired-end           | H37Rv (NC_000962.3)                        | BWA MEM               | GATK              | 50                               | 1                                                            | poorly mapped sequences, SNVs with strand-bias or tail-distance-bias    | yes                                            | no                                          | <i>none</i>                                        |
| (16)  | Illumina MiSeq                                | 12-215x                  | 250bp                | paired-end           | H37Rv (NC_000962.3)                        | Snippy v2.6           | Nesoni v0.130     | 30                               | 10                                                           | repetitive sequences                                                    | no                                             | no                                          | <i>none</i>                                        |
| (17)  | Illumina HiSeq 2000                           | 715 to 1,252x            | 51bp                 | paired-end           | Ancestral                                  | BWA                   | SAMtools, Varscan | 10                               | 95 ( <i>screening heterozygous positions in a 2nd step</i> ) | <i>not indicated</i>                                                    | yes                                            | no                                          | Spoligotyping, 24-loci MIRU-VNTR, RFLP             |
| (18)  | Illumina                                      | 154x (median)            | <i>not indicated</i> | <i>not indicated</i> | H37Rv (NC_000962)                          | MAQ                   | bre-seq pipeline  | <i>not indicated</i>             | 10                                                           | repetitive regions                                                      | no                                             | yes                                         | <i>none</i>                                        |
| (19)  | Illumina HiSeq 2000                           | 1000x                    | <i>not indicated</i> | <i>not indicated</i> | H37Rv (NC_000962.3) CCDC5079 (NC_021251.1) | BWA                   | SAMtools          | <i>not indicated</i>             | 5                                                            | Mobile genetic elements, PE/PPE, PE-PGRS                                | no                                             | yes                                         | <i>none</i>                                        |
| (20)  | Illumina MiSeq                                | 244x and 469x            | <i>not indicated</i> | <i>not indicated</i> | H37Rv                                      | BWA v0.7.5            | SAMtools V0.1.19  | <i>not indicated</i>             | <i>not indicated</i>                                         | <i>not indicated</i>                                                    | no                                             | no                                          | Line probe assay                                   |
| (21)  | Illumina MiSeq                                | <i>not indicated</i>     | <i>not indicated</i> | paired-end           | H37Rv                                      | PhyResSE              | PhyResSE, Mycrobe | 2                                | 70                                                           | repeat regions and regions difficult to map                             | no                                             | no                                          | <i>none</i>                                        |
| (22)  | Illumina MiSeq                                | 64x                      | 250bp                | paired-end           | H37Rv (NC_000962.3)                        | BWA-mem               | GATK, SAMtools    | 10                               | 75                                                           | repetitive elements (PE/PPE, PE-PGRS, phages, transposases, integrases) | no                                             | yes                                         | 24-loci MIRU-VNTR, Spoligotyping                   |



| Study | Sequencing Platform         | Average Depth (range) | Read length          | Sequencing Type      | Reference strain (Accession Number)                          | Aligner                            | Variant caller                          | Min. coverage (at specific site) | Hetero-frequency cut-off (%)             | Genomic regions excluded from analysis                                                                                                              | Visual/manual inspection of sequences (yes/no) | Validation by Sanger/targeted PCR (yes/no) | Additional (non-WGS based) genotyping methods used            |
|-------|-----------------------------|-----------------------|----------------------|----------------------|--------------------------------------------------------------|------------------------------------|-----------------------------------------|----------------------------------|------------------------------------------|-----------------------------------------------------------------------------------------------------------------------------------------------------|------------------------------------------------|--------------------------------------------|---------------------------------------------------------------|
| (23)  | Illumina HiSeq              | <i>not indicated</i>  | min 45bp             | <i>not indicated</i> | H37Rv (NC_018143.1)                                          | nesoni bowtie tool                 | nensoni consensus                       | 10                               | <i>not indicated</i>                     | <i>not indicated</i>                                                                                                                                | no                                             | no                                         | Spoligotyping, 24-loci MIRU-VNTR                              |
| (24)  | Illumina HiSeq              | 495 - 728x            | 101bp                | paired-end           | H37Rv (NC_000962.3)                                          | BWA v0.5.9                         | Pilon                                   | <i>not indicated</i>             | 0                                        | highly repetitive regions                                                                                                                           | yes                                            | yes                                        | Sanger sequencing                                             |
| (25)  | Illumina HiSeq              | 37-126x               | 100bp                | paired-end           | re-sequenced (corrected) H37Rv Cole <i>et al</i> )           | SMALT                              | SAMtools                                | 2                                | 70                                       | repetitive regions including PE-PPE genes                                                                                                           | yes                                            | no                                         | Spoligotyping, 24-loci MIRU-VNTR, RFLP                        |
| (26)  | Illumina HiSeq 2000         | 36-303x               | 100bp                | paired-end           | Ancestral Genome (Comas <i>et al</i> ) & H37Rv (NC_000962.3) | <i>not indicated</i>               | SAMtools                                | 4                                | 10                                       | removed genomic positions suspected to have false polymorphisms based on the distribution of allele frequencies across isolates of the same patient | no                                             | no                                         | <i>none</i>                                                   |
| (27)  | Illumina HiSeq 2000         | 140x                  | 101bp                | paired-end           | H37Rv (CP003248.2)                                           | BWA                                | Pilon v1.5                              | <i>not indicated</i>             | 0                                        | <i>not indicated</i>                                                                                                                                | no                                             | no                                         | <i>none</i>                                                   |
| (28)  | SOLID 3                     | 155-234x              | <i>not indicated</i> | <i>not indicated</i> | H37Rv                                                        | Lifescape Genome analysis software | SAMtools v0.1.18 & bcftools v0.1.17-dev | 20                               | <i>not indicated</i>                     | repeat regions (PE/PPE and PE-PGRS gene family)                                                                                                     | no                                             | yes ( <i>katG</i> )                        | Spoligotyping, RFLP                                           |
| (29)  | Illumina HiSeq              | 130 +/- 79x           | <i>not indicated</i> | paired-end           | H37Rv (CP003248.2)                                           | BWA v0.5.9                         | Pilon v1.5                              | <i>not indicated</i>             | <i>not indicated</i>                     | <i>not indicated</i>                                                                                                                                | no                                             | no                                         | Spoligotyping                                                 |
| (30)  | Illumina HiSeq 2000         | <i>not indicated</i>  | <i>not indicated</i> | paired-end           | H37Rv (AL123456.3)                                           | bwa-mem v0.7                       | SAMtools (v1.2) GATK (v3.3-0)           | 10                               | <i>not indicated</i>                     | highly repetitive and variable regions (e.g. PE/PPE)                                                                                                | no                                             | no                                         | Spoligotyping; IS6110 RFLP                                    |
| (31)  | Illumina HiSeq 2500 & MiSeq | >20x                  | 100bp & 250bp        | paired-end           | H37Rv (NC_000962.3)                                          | BWA-mem v0.7.3a-r367               | SAMtools v0.1.19                        | 4                                | 75 or 100 ( <i>unclear formulation</i> ) | <i>not indicated</i>                                                                                                                                | no                                             | no                                         | 24-loci MIRU-VNTR                                             |
| (32)  | Illumina HiSeq 2000         | 850x                  | <i>not indicated</i> | paired-end           | CCDC5079 (GenBank CP001641) H37Rv (GenBank AL123456)         | BWA                                | SAMtools                                | 5                                | 1.5                                      | repetitive regions including PPE/PE-PGRS genes, insertion elements...                                                                               | no                                             | no                                         | <i>none</i>                                                   |
| (33)  | Illumina HiSeq 2000 & MiSeq | <i>not indicated</i>  | 101-51bp             | paired-end           | Ancestral Genome (Comas <i>et al</i> )                       | BWA                                | SAMtools; VarScan                       | 10                               | <i>not indicated</i>                     | <i>not indicated</i>                                                                                                                                | no                                             | yes                                        | 24-loci MIRU-VNTR, allele specific PCR, ligation-mediated PCR |

| Study | Sequencing Platform | Average Depth (range)                        | Read length          | Sequencing Type      | Reference strain (Accession Number)                  | Aligner                                     | Variant caller        | Min. coverage (at specific site) | Hetero-frequency cut-off (%) | Genomic regions excluded from analysis                                                                 | Visual/manual inspection of sequences (yes/no) | Validation by Sanger/targeted PCR (yes/no) | Additional (non-WGS based) genotyping methods used |
|-------|---------------------|----------------------------------------------|----------------------|----------------------|------------------------------------------------------|---------------------------------------------|-----------------------|----------------------------------|------------------------------|--------------------------------------------------------------------------------------------------------|------------------------------------------------|--------------------------------------------|----------------------------------------------------|
| (34)  | Illumina HiSeq 2000 | <i>not indicated</i>                         | 300bp                | paired-end           | <i>not indicated</i>                                 | <i>not indicated</i>                        | In-house Perl script  | <i>not indicated</i>             | <i>not indicated</i>         | <i>not indicated</i>                                                                                   | no                                             | no                                         | 12-loci MIRU-VNTR, RT PCR melting curve assay      |
| (35)  | Illumina MiSeq      | 49.6x (24.3 - 78.4x)                         | 250bp                | paired-end           | H37Rv (NC_000962.3)                                  | unclear (TMAP? But that is for Ion Torrent) | SAMtools              | 4                                | 75                           | highly repetitive regions and regions of deletions                                                     | no                                             | no                                         | <i>none</i>                                        |
| (36)  | SMRT PacBio         | <b>Isol. 1:</b> 307x<br><b>Isol. 2:</b> 241x | 10-20kbp             | <i>not indicated</i> | H37Rv (AL123456.3) Beijing reference (NZ_CP011510.1) | Mauve aligner (v2.3.1)                      | Quiver                | 40                               | <i>not indicated</i>         | none                                                                                                   | no                                             | yes                                        | 24-loci MIRU-VNTR, Sanger sequencing               |
| (37)  | Illumina MiSeq      | 87x (62-113x)                                | <i>not indicated</i> | paired-end           | hypothetical ancestral genome ( <i>Comas et al</i> ) | BWA and MAQ                                 | SAMtools              | 20                               | <i>not indicated</i>         | repeats, phages, PE/PPE, variants near indels, variants in regions with anomalous accumulation of SNVs | yes                                            | no                                         | 24-locus MIRU-VNTR                                 |
| (38)  | Illumina HiSeq 2500 | 24 - 153x                                    | 100bp                | paired-end           | H37Rv (NC000962)                                     | CLC Genomic workbench                       | CLC Genomic workbench | <i>not indicated</i>             | <i>not indicated</i>         | <i>not indicated</i>                                                                                   | no                                             | no                                         | <i>none</i>                                        |

**Table S4:** Genes micro-evolving in more than two studies

| Gene    | Alter. name     | No. of studies reporting variants in that gene | Study | No. of patients with a variant in that gene /Total no. of isolates available of that patient |                       | No. of different variants found | Isolates in which the variant was present                                                                                                                                                                                                                   | Drug Resistance Level | Lineage              | Variant (Amino acid change at codon)    | PROVEAN prediction (cut-off - 2.5) | hetero-frequency     | gain/loss of variant over time | Product & Protein Function (39)                                               | Gene function class                   |
|---------|-----------------|------------------------------------------------|-------|----------------------------------------------------------------------------------------------|-----------------------|---------------------------------|-------------------------------------------------------------------------------------------------------------------------------------------------------------------------------------------------------------------------------------------------------------|-----------------------|----------------------|-----------------------------------------|------------------------------------|----------------------|--------------------------------|-------------------------------------------------------------------------------|---------------------------------------|
| Rv0118c | <i>oxcA</i>     | 3                                              | (4)   | 1                                                                                            | 3                     | 1                               | <b>Patient 1:</b> Isol. a1                                                                                                                                                                                                                                  | Scpt.                 | L2                   | A185P                                   | deleterious -2.52                  | 0.111                | loss                           | Probable oxalyl-CoA decarboxylase OxcA; Involved in catabolism of oxalic acid | intermediary metabolism & respiration |
| Rv0118c | <i>oxcA</i>     |                                                | (26)  | 1                                                                                            | 93                    | 1                               | <b>Patient 44:</b> Spleen: B2                                                                                                                                                                                                                               | Scpt.                 | L2                   | A284A                                   | neutral                            | 1.00                 | N/A                            |                                                                               |                                       |
| Rv0118c | <i>oxcA</i>     |                                                | (32)  | 1                                                                                            | 2                     | 1                               | <b>Patient 4:</b> Isol. 1 (timepoint 0)                                                                                                                                                                                                                     | Scpt.                 | L2                   | A573A                                   | neutral                            | 0.1262               | loss                           |                                                                               |                                       |
| Rv0278c | <i>PE-PGRS3</i> | 3                                              | (26)  | 1                                                                                            | 117                   | 1                               | <b>Patient 34:</b><br>Eta: A2,A3,C1,C4,C5<br>Lung1:A1-A5,B1-B5,C1-C5<br>Lung2:A1,A3-A4,B1-B5,C2,C4-C6<br>Lung3:A1,A3-A5,B1-B5,C1-C5<br>Lung4:B3<br>Lung5:A1-A3,A5,B1-B5,C3-C5<br>Lung6:A1-A5,B-B5,C1-C5<br>Liver:A1-A5,B1,C2-C5<br>Spleen:A1,A2,B1-B5,C2-C5 | Scpt.                 | L2                   | P681T                                   | neutral -0.38                      | 0.25-1               | N/A                            | Function unknown; PE-PGRS family protein PE_PGRS3                             | PE/PPE family                         |
| Rv0278c | <i>PE-PGRS3</i> |                                                | (5)   | 1                                                                                            | 8                     | 1                               | Isol. 3: P3-ITL<br>Isol. 7: P8-ITL                                                                                                                                                                                                                          | MDR                   | L4                   | R807G                                   | neutral 2.15                       | <i>not indicated</i> | transient                      |                                                                               |                                       |
| Rv0278c | <i>PE-PGRS3</i> |                                                | (38)  | <i>not assignable</i>                                                                        | <i>not assignable</i> | 1                               | <i>not indicated</i>                                                                                                                                                                                                                                        | MDR - XDR             | <i>not indicated</i> | A557? (nucleotide change not indicated) | N/A                                | <i>not indicated</i> | gain                           |                                                                               |                                       |
| Rv0457c | ---             | 3                                              | (4)   | 1                                                                                            | 3                     | 1                               | <b>Patient a:</b> Isol. 1                                                                                                                                                                                                                                   | Scpt.                 | L2                   | E17Q                                    | deleterious -2.92                  | 0.12                 | loss                           | Function unknown; probable peptidase                                          | Intermediary metabolism & respiration |
| Rv0457c | ---             |                                                | (32)  | 1                                                                                            | 4                     | 1                               | <b>Patient 2:</b> Isol. 2 (timepoint 2)                                                                                                                                                                                                                     | Scpt.                 | L2                   | A292T                                   | neutral                            | 0.0983               | transient                      |                                                                               |                                       |

| Gene    | Alter. name | No. of studies reporting variants in that gene | Study | No. of patients with a variant in that gene /Total no. of isolates available of that patient |     | No. of different variants found | Isolates in which the variant was present                                                                                              | Drug Resistance Level              | Lineage              | Variant (Amino acid change at codon)            | PROVEAN prediction (cut-off - 2.5)                            | hetero-frequency     | gain/loss of variant over time | Product & Protein Function (39)                              | Gene function class                   |
|---------|-------------|------------------------------------------------|-------|----------------------------------------------------------------------------------------------|-----|---------------------------------|----------------------------------------------------------------------------------------------------------------------------------------|------------------------------------|----------------------|-------------------------------------------------|---------------------------------------------------------------|----------------------|--------------------------------|--------------------------------------------------------------|---------------------------------------|
| Rv0457c | ---         |                                                | (37)  | 1                                                                                            | 2   | 1                               | Case 5: Isol. 2                                                                                                                        | Scpt.                              | <i>not indicated</i> | L16R                                            | deleterious -5.84                                             | <i>not indicated</i> | gain                           |                                                              |                                       |
| Rv0565c | ---         | 3                                              | (4)   | 1                                                                                            | 2   | 1                               | Patient_c: Isol. 2                                                                                                                     |                                    |                      | Y245C                                           | neutral -2.12                                                 | 0.074                | gain                           |                                                              |                                       |
| Rv0565c | ---         |                                                | (8)   | 1                                                                                            | 3   | 1                               | Patient A: Isol. 1 (mixed infection)<br>Isol. 2<br>Isol. 3                                                                             | poly/MDR<br>preXDR<br>XDR          | L2                   | R59H                                            | deleterious -5.0                                              | 0.08<br>1<br>0.35    | transient                      |                                                              |                                       |
| Rv0565c | ---         |                                                | (38)  | <i>not assignable</i>                                                                        | N/A | 1                               | <i>not indicated</i>                                                                                                                   | MDR-XDR                            | <i>not indicated</i> | G347? (nucleotide change <i>not indicated</i> ) | N/A                                                           | <i>not indicated</i> | gain                           | Probable monooxygenase                                       | Intermediary metabolism & respiration |
| Rv0726c | ---         | 3                                              | (6)   | 1                                                                                            | 2   | <i>not indicated</i>            | Patient 4                                                                                                                              | Scpt.                              | L4                   | <i>not indicated</i>                            | N/A                                                           | <i>not indicated</i> | N/A                            |                                                              |                                       |
| Rv0726c | ---         |                                                | (26)  | 1                                                                                            | 123 | 1                               | Patient 30:<br>Lung1: A5<br>Lung4: A5<br>Lung6: B3                                                                                     | Scpt.                              | L4                   | V58L                                            | neutral 0.89                                                  | 0.01<br>0.02<br>0.26 | N/A                            | Putative S-adenosyl-L-methionine-dependent methyltransferase | lipid metabolism                      |
| Rv0726c | ---         |                                                | (32)  | 1                                                                                            | 4   | 1                               | Patient 10: Isol. 3 (timepoint week 6)                                                                                                 | MDR                                | L2                   | P128S                                           | deleterious -7.14                                             | 0.0724               | transient                      |                                                              |                                       |
| Rv0746  | PE-PGRS9    | 3                                              | (12)  | 1                                                                                            | 2   | 1                               | Patient 2: Isol. 2b                                                                                                                    | XDR                                | L2                   | T320A                                           | neutral 1.61                                                  | 0.75-1               | gain                           |                                                              |                                       |
| Rv0746  | PE-PGRS9    |                                                | (5)   | 1                                                                                            | 8   | 4                               | Isol. P6-ITL, Isol. P8-ITL<br>Isol. P1-P3-ITL, P5 - P6-ITL,<br>P8-ITL, P10-ITL<br>Isol. P3-ITL<br>Isol. P1-3-ITL, P5-6-ITL,<br>P10-ITL | MDR<br>Scpt-MDR<br>MDR<br>Scpt-MDR | L4                   | E191G<br>T320A<br>T252A<br>N280D                | neutral 3.65<br>neutral 1.61<br>neutral 0.30<br>neutral -0.26 | <i>not indicated</i> | transient                      |                                                              |                                       |
| Rv0746  | PE-PGRS9    |                                                | (38)  | <i>not assignable</i>                                                                        | N/A | 1                               | <i>in 4 different isolates?</i>                                                                                                        | MDR-XDR                            | <i>not indicated</i> | V739? (nucleotide change <i>not indicated</i> ) | N/A                                                           | <i>not indicated</i> | gain                           | Function unknown;<br>PE-PGRS family<br>protein PE_PGRS9      | PE/PPE family                         |

| Gene    | Alter. name       | No. of studies reporting variants in that gene | Study | No. of patients with a variant in that gene /Total no. of isolates available of that patient |    | No. of different variants found | Isolates in which the variant was present                                                | Drug Resistance Level | Lineage              | Variant (Amino acid change at codon) | PROVEAN prediction (cut-off - 2.5) | hetero-frequency                                               | gain/loss of variant over time | Product & Protein Function (39)                                                                                                                 | Gene function class |
|---------|-------------------|------------------------------------------------|-------|----------------------------------------------------------------------------------------------|----|---------------------------------|------------------------------------------------------------------------------------------|-----------------------|----------------------|--------------------------------------|------------------------------------|----------------------------------------------------------------|--------------------------------|-------------------------------------------------------------------------------------------------------------------------------------------------|---------------------|
| Rv1129c | <i>prpR</i>       | 3                                              | (6)   | 1                                                                                            | 2  | <i>not indicated</i>            | <b>Patient 3</b>                                                                         | Scpt.                 | L2                   | <i>not indicated</i>                 | N/A                                | <i>not indicated</i>                                           | N/A                            | HTH-type transcriptional regulator PrpR; Involved in transcriptional mechanism                                                                  | regulatory proteins |
| Rv1129c | <i>prpR</i>       |                                                | (26)  | 1                                                                                            | 98 | 1                               | <b>Patient 15:</b><br>Lung3: C1<br>Lung4: A5, B2, B4<br>Lung6: B3                        | Scpt.                 | L4                   | S357R                                | deleterious -5.0                   | 0.01 - 0.13                                                    | N/A                            |                                                                                                                                                 |                     |
| Rv1129c | <i>prpR</i>       |                                                | (32)  | 1                                                                                            | 5  | 1                               | <b>Patient 11:</b> Isol. 1, 3, 4                                                         | preXDR                | L4                   | D387G                                | deleterious -7.0                   | 0.88<br>0.87<br>0.67                                           | loss                           |                                                                                                                                                 |                     |
| Rv1181  | <i>pks4, msl3</i> | 4                                              | (31)  | 1                                                                                            | 2  | 1                               | <b>Patient 031</b> Isol. 2                                                               | Scpt.                 | L2                   | P1330P                               | neutral                            | <i>not indicated</i>                                           | gain                           | Mycolipanoate synthase; Polyketide synthase involved in the biosynthesis of methyl-branched fatty acids                                         | lipid metabolism    |
| Rv1181  | <i>pks4, msl3</i> |                                                | (23)  | 1                                                                                            | 2  | 1                               | <b>Patient 6,</b> blood isolate                                                          | Scpt.                 | L4                   | S1512S                               | neutral                            | <i>not indicated</i>                                           | N/A                            |                                                                                                                                                 |                     |
| Rv1181  | <i>pks4, msl3</i> |                                                | (26)  | 2                                                                                            | 49 | 2                               | <b>Patient 9:</b><br>Lymph<br>Liver<br><b>Patient 29:</b><br>Liver: B4, B5<br>Spleen: B4 | MDR<br>Scpt.          | L4<br>L4             | M824T<br>L301P                       | neutral -2.34<br>deleterious -5.64 | <b>P9:</b><br>0.01<br>0.12<br><b>P29:</b><br>0.06, 1.0<br>0.01 | N/A                            |                                                                                                                                                 |                     |
| Rv1181  | <i>pks4, msl3</i> |                                                | (32)  | 2                                                                                            | 5  | 2                               | <b>Patient 2:</b> Isol. 1 (timepoint 0)<br><b>Patient 8:</b> Isol. 3 (timepoint week 4)  | Scpt.<br>INH-mono     | L2<br>L2             | S846S<br>R630L                       | neutral<br>deleterious -4.49       | <b>P2:</b> 0.0744<br><b>P8:</b> 0.0387                         | loss<br>transient              |                                                                                                                                                 |                     |
| Rv1527c | <i>pks5</i>       | 3                                              | (33)  | 1                                                                                            | 2  | 1                               | <b>Patient 1:</b> Isol. 2                                                                | <i>not indicated</i>  | <i>not indicated</i> | <i>no position indicated</i>         | N/A                                | <i>not indicated</i>                                           | gain                           | Mycocerosic acid synthase-like polyketide synthase; Polyketide synthase likely involved in the biosynthesis of a polymethyl-branched fatty acid | lipid metabolism    |

| Gene    | Alter. name   | No. of studies reporting variants in that gene | Study | No. of patients with a variant in that gene /Total no. of isolates available of that patient |   | No. of different variants found | Isolates in which the variant was present                                                                                                                                                                                         | Drug Resistance Level   | Lineage                   | Variant (Amino acid change at codon) | PROVEAN prediction (cut-off - 2.5)                      | hetero-frequency                                                                                                                                                                                                   | gain/loss of variant over time | Product & Protein Function (39)                                                                                           | Gene function class    |
|---------|---------------|------------------------------------------------|-------|----------------------------------------------------------------------------------------------|---|---------------------------------|-----------------------------------------------------------------------------------------------------------------------------------------------------------------------------------------------------------------------------------|-------------------------|---------------------------|--------------------------------------|---------------------------------------------------------|--------------------------------------------------------------------------------------------------------------------------------------------------------------------------------------------------------------------|--------------------------------|---------------------------------------------------------------------------------------------------------------------------|------------------------|
|         |               |                                                |       |                                                                                              |   |                                 |                                                                                                                                                                                                                                   |                         |                           |                                      |                                                         |                                                                                                                                                                                                                    |                                |                                                                                                                           |                        |
| Rv1527c | <i>pks5</i>   |                                                | (26)  | 3                                                                                            | 3 | 105<br>116<br>97                | <b>Patient 25:</b><br>Eta: C1,C3<br>Lung1: A2,A3,A4,B1,B2,C4,C5<br>Lung2: A1,A2,B1,C3,C4<br>Lung3: A3,B4,B5<br><b>Patient 28:</b><br>Lung4: B2<br>Lung5: A2,A4,B1<br>Liver: A4<br><b>Patient 38:</b><br>Lung3: B1,B5<br>Liver: C1 | Scpt.<br>Scpt.<br>Scpt. | L2<br>L2/L4 (mixed)<br>L4 | M672I<br>N1510K<br>V1504I            | deleterious -3.59<br>deleterious -2.82<br>neutral -0.96 | <b>P25:</b><br>Eta: 0.24,0.01<br>Lung1: 0.01-1.00<br>Lung2: 0.03-0.18<br>Lung3: 0.02-0.41<br><b>P28:</b><br>Lung4: 0.06<br>Lung5: 0.01-0.25<br>Liver-A4: 0.04<br><b>P38:</b><br>Lung3: 0.02,0.09<br>Liver-C1: 1.00 | N/A                            |                                                                                                                           |                        |
| Rv1527c | <i>pks5</i>   |                                                | (32)  | 1                                                                                            | 4 | 1                               | <b>Patient 10:</b> Isol. 1                                                                                                                                                                                                        | MDR                     | L2                        | P261L                                | deleterious -3.68                                       | 0.0162                                                                                                                                                                                                             | loss                           |                                                                                                                           |                        |
| Rv2024c | ---           | 3                                              | (4)   | 1                                                                                            | 2 | 1                               | <b>Patient_b:</b> Isol. 1                                                                                                                                                                                                         | INH, SM                 | L2                        | I145T                                | deleterious -4.53                                       | 0.089                                                                                                                                                                                                              | loss                           |                                                                                                                           |                        |
| Rv2024c | ---           |                                                | (26)  | 1                                                                                            | 8 | 1                               | <b>Patient 5:</b><br>Eta<br>Lung4                                                                                                                                                                                                 | Scpt.                   | L4                        | Y42Y                                 | neutral                                                 | 0.03<br>0.18                                                                                                                                                                                                       | N/A                            |                                                                                                                           |                        |
| Rv2024c | ---           |                                                | (5)   | 1                                                                                            | 8 | 2                               | Isol. P1-P2-ITL,P4-6ITL,P8-ITL,P10-ITL<br>Isol. P1-P2-ITL,P4-6ITL,P8-ITL,P10-ITL                                                                                                                                                  | MDR                     | L4                        | W47R<br>D154G                        | neutral 4.48<br>neutral -0.37                           | not indicated                                                                                                                                                                                                      | transient                      | Function unknown                                                                                                          | conserved hypothetical |
| Rv2187  | <i>fadD15</i> | 3                                              | (4)   | 1                                                                                            | 3 | 1                               | <b>Patient_a:</b> isolate 2                                                                                                                                                                                                       | INH-mono                | L2                        | F230S                                | deleterious -7.91                                       | 0.085                                                                                                                                                                                                              | transient                      | Long-chain-fatty-acid-CoA ligase FadD15; Catalyzes the activation of long-chain fatty acids as acyl-coenzyme A (acyl-CoA) | lipid metabolism       |

| Gene    | Alter. name   | No. of studies reporting variants in that gene | Study | No. of patients with a variant in that gene /Total no. of isolates available of that patient |     | No. of different variants found | Isolates in which the variant was present                                                                                                                                                                                                                                 | Drug Resistance Level | Lineage | Variant (Amino acid change at codon) | PROVEAN prediction (cut-off - 2.5) | hetero-frequency                                                                                                     | gain/loss of variant over time | Product & Protein Function (39)                                                                                                             | Gene function class        |
|---------|---------------|------------------------------------------------|-------|----------------------------------------------------------------------------------------------|-----|---------------------------------|---------------------------------------------------------------------------------------------------------------------------------------------------------------------------------------------------------------------------------------------------------------------------|-----------------------|---------|--------------------------------------|------------------------------------|----------------------------------------------------------------------------------------------------------------------|--------------------------------|---------------------------------------------------------------------------------------------------------------------------------------------|----------------------------|
| Rv2187  | <i>fadD15</i> |                                                | (26)  | 1                                                                                            | 105 | 1                               | <b>Patient 25:</b> detected in 54 isolates:<br>Eta: A3,B5,B6,C1,C3,C4<br>Lung1:A2,A3,B1,B3,B4,C1,C2,C4<br>Lung2:A1,A2,A4,B1,B5,C2-C5<br>Lung3:A3, A4, B3,B4,B5,C1-C5<br>Lung5:A4,+H29B3,C2,D3-D5<br>Lung6:A1,A2,A3,B3,B5<br>Liver:A5,C1,C4,B2<br>Spleen:A4,A5,B2,B3,B5,C2 | Scpt.                 | L2      | L503L                                | neutral                            | 0.07 - 1.00<br>0.01 - 0.50<br>0.05 - 0.62<br>0.04 - 0.42<br>0.02 - 1.00<br>0.02 - 0.91<br>0.01 - 0.09<br>0.03 - 0.25 | N/A                            |                                                                                                                                             |                            |
| Rv2187  | <i>fadD15</i> |                                                | (32)  | 1                                                                                            | 5   | 1                               | <b>Patient 6:</b> Isol. 3 (timepoint week 4)                                                                                                                                                                                                                              | INH-mono              | L2      | D570D                                | neutral                            | 0.1909                                                                                                               | transient                      |                                                                                                                                             |                            |
| Rv2477c | <i>ettA</i>   | 3                                              | (28)  | 1                                                                                            | 2   | 1                               | <b>Patient 3</b> (C21/C27) C --> T mutation happens in same isolate than the increase to INH-resistance                                                                                                                                                                   | INH-mono              | L4      | R287C                                | deleterious -7.97                  | <i>not indicated</i>                                                                                                 | gain                           | Energy-dependent translational throttle protein EttA;translation factor; essential gene for <i>in vitro</i> growth                          | cell wall & cell processes |
| Rv2477c | <i>ettA</i>   |                                                | (22)  | 1                                                                                            | 2   | 1                               | <b>Patient 2:</b> isolate 2                                                                                                                                                                                                                                               | preXDR                | L2      | W135G                                | deleterious -12.76                 | ≥ 0.75                                                                                                               | gain                           |                                                                                                                                             |                            |
| Rv2477c | <i>ettA</i>   |                                                | (21)  | 1                                                                                            | 2   | 1                               | <b>Patient 1:</b> isolate 2                                                                                                                                                                                                                                               | INH, STR              | L4      | P547P                                | neutral                            | ≥ 0.70                                                                                                               | gain                           |                                                                                                                                             |                            |
| Rv2931  | <i>ppsA</i>   | 3                                              | (26)  | 1                                                                                            | 98  | 1                               | <b>Patient 35:</b><br>Eta: A3, A5, B2<br>Lung1: C1<br>Lung2: A3, C1<br>Lung3: B4<br>Lung4: B4, C5<br>Lung5: A2                                                                                                                                                            | Scpt.                 | L4      | V61I                                 | neutral -0.46                      | Eta: 0.01;0.03;0.02<br>Lung1: 0.67<br>Lung 2: 0.04; 0.01<br>Lung 3: 0.01<br>Lung 4: 0.03; 0.02<br>Lung 5: 0.02       | N/A                            | Phenolphthiocerol synthesis type-I polyketide synthase PpsA. Involved in phenolphthiocerol & phthiocerol dimycocerosate (dim) biosynthesis. | lipid metabolism           |
| Rv2931  | <i>ppsA</i>   |                                                | (32)  | 1                                                                                            | 5   | 1                               | <b>Patient 11:</b> isol. 3 (timepoint 4)                                                                                                                                                                                                                                  | MDR                   | L4      | H13P                                 | neutral -1.58                      | 0.015                                                                                                                | transient                      |                                                                                                                                             |                            |

| Gene    | Alter. name | No. of studies reporting variants in that gene | Study | No. of patients with a variant in that gene /Total no. of isolates available of that patient |   | No. of different variants found | Isolates in which the variant was present            | Drug Resistance Level | Lineage | Variant (Amino acid change at codon) | PROVEAN prediction (cut-off - 2.5) | hetero-frequency     | gain/loss of variant over time | Product & Protein Function (39)                                                                  | Gene function class                   |
|---------|-------------|------------------------------------------------|-------|----------------------------------------------------------------------------------------------|---|---------------------------------|------------------------------------------------------|-----------------------|---------|--------------------------------------|------------------------------------|----------------------|--------------------------------|--------------------------------------------------------------------------------------------------|---------------------------------------|
| Rv2931  | <i>ppsA</i> |                                                | (5)   | 1                                                                                            | 8 | 2                               | Isol. P5-ITL, P6-ITL, P8-ITL<br>Isol. P6-ITL, P8-ITL | MDR<br>MDR            | L4      | A803T<br>R877H                       | neutral -0.58<br>neutral -1.93     | <i>not indicated</i> | transient<br>transient         |                                                                                                  |                                       |
| Rv2935  | <i>ppsE</i> | 4                                              | (14)  | 1                                                                                            | 2 | 1                               | <b>Patient 2:</b> isolate 2                          | MDR                   | L2      | C582R                                | deleterious -11.13                 | 0.69                 | gain                           | Phthiocerol synthesis polyketide synthase type I PpsE; Involved in the elongation of fatty acids | lipid metabolism                      |
| Rv2935  | <i>ppsE</i> |                                                | (4)   | 1                                                                                            | 2 | 1                               | <b>Patient C:</b> isolate 2                          | MDR                   | L2      | A718A                                | neutral                            | 0.1                  | gain                           |                                                                                                  |                                       |
| Rv2935  | <i>ppsE</i> |                                                | (2)   | 1                                                                                            | 2 | 1                               | <b>Patient 8:</b> isolate 2                          | MDR                   | L4      | A478E                                | neutral 1.26                       | 1.00                 | gain                           |                                                                                                  |                                       |
| Rv2935  | <i>ppsE</i> |                                                | (32)  | 1                                                                                            | 5 | 1                               | <b>Patient 12:</b> isolate 1 (timepoint 0)           | MDR                   | L2      | A1220G                               | neutral -0.58                      | 0.0178               | loss                           |                                                                                                  |                                       |
| Rv2973  | <i>recG</i> | 3                                              | (2)   | 1                                                                                            | 2 | 1                               | <b>Patient 10:</b> isolate 2                         | MDR                   | L4      | M657R                                | neutral -1.09                      | 1.00                 | gain                           | Probable ATP-dependent DNA helicase RecG; Critical role in recombination and DNA repair          | information pathways                  |
| Rv2973  | <i>recG</i> |                                                | (10)  | 1                                                                                            | 9 | 1                               | Present in isolate SF8                               | XDR                   | L4      | V521A                                | deleterious -3.98                  | 0.53                 | transient                      |                                                                                                  |                                       |
| Rv2973  | <i>recG</i> |                                                | (32)  | 1                                                                                            | 4 | 1                               | <b>Patient 02:</b> isolate 2 (timepoint 2)           | Scpt.                 | L2      | S475A                                | deleterious -2.68                  | 0.2665               | trans.                         |                                                                                                  |                                       |
| Rv3303c | <i>lpdA</i> | 3                                              | (6)   | 1                                                                                            | 2 | 1                               | <b>Patient 13:</b> isolate 2                         | Scpt.                 | L4      | <i>not indicated</i>                 | N/A                                | <i>not indicated</i> | gain                           | NAD(P)H quinone reductase LpdA; Involved in energy metabolism. Protects against oxidative stress | intermediary metabolism & respiration |
| Rv3303c | <i>lpdA</i> |                                                | (32)  | 1                                                                                            | 5 | 1                               | <b>Patient 12:</b> isolates 2-5 (timepoints 2,4,6,8) | MDR                   | L2      | L470L                                | neutral                            | 0.0156 - 0.2795      | gain                           |                                                                                                  |                                       |
| Rv3303c | <i>lpdA</i> |                                                | (36)  | 1                                                                                            | 2 | 1                               | <b>Patient 1:</b> isolate 2                          | preXDR                | L2      | V44I                                 | neutral -0.91                      | <i>not indicated</i> | gain                           |                                                                                                  |                                       |



| Gene    | Alter. name | No. of studies reporting variants in that gene | Study | No. of patients with a variant in that gene /Total no. of isolates available of that patient |   | No. of different variants found | Isolates in which the variant was present                  | Drug Resistance Level | Lineage | Variant (Amino acid change at codon)                                                          | PROVEAN prediction (cut-off - 2.5)                                                                       | hetero-frequency                              | gain/loss of variant over time       | Product & Protein Function (39)                                                                                                                    | Gene function class                   |
|---------|-------------|------------------------------------------------|-------|----------------------------------------------------------------------------------------------|---|---------------------------------|------------------------------------------------------------|-----------------------|---------|-----------------------------------------------------------------------------------------------|----------------------------------------------------------------------------------------------------------|-----------------------------------------------|--------------------------------------|----------------------------------------------------------------------------------------------------------------------------------------------------|---------------------------------------|
| Rv3696  | <i>glpK</i> | 6                                              | (14)  | 1                                                                                            | 2 | 2                               | <b>Patient 1:</b> isolate 1<br><b>Patient 1:</b> isolate 2 | RIF-mono<br>MDR       | L4      | <b>Isolate 1:</b><br>ins AC<br>( <i>position not indicated</i> )<br><b>Isolate 2:</b><br>T91I | deleterious<br>-5.98                                                                                     | 0.73<br>0.8                                   | loss<br>gain                         | Probable glycerol kinase GlpK. Acts in rate-limiting step in glycerol utilization.<br>Key enzyme in the regulation of glycerol uptake & metabolism | Intermediary metabolism & respiration |
| Rv3696  | <i>glpK</i> |                                                | (10)  | 1                                                                                            | 9 | 2                               | isolate S9<br>isolate S9                                   | XDR<br>XDR            | L4      | W481G<br>W114C                                                                                | deleterious<br>-12.75<br>deleterious<br>-12.96                                                           | 0.3146<br>0.375                               | gain<br>gain                         |                                                                                                                                                    |                                       |
| Rv3696  | <i>glpK</i> |                                                | (22)  | 1                                                                                            | 2 | 1                               | <b>Patient 1:</b> isolate 2                                | XDR                   | L2      | S26R                                                                                          | deleterious<br>-4.95                                                                                     | ≥ 0.75                                        | gain                                 |                                                                                                                                                    |                                       |
| Rv3696  | <i>glpK</i> |                                                | (21)  | 1                                                                                            | 2 | 1                               | <b>Patient 3:</b> isolate 1                                | Scpt.                 | L4      | N312N                                                                                         | neutral                                                                                                  | ≥ 0.70                                        | loss                                 |                                                                                                                                                    |                                       |
| Rv3696  | <i>glpK</i> |                                                | (2)   | 1                                                                                            | 2 | 1                               | <b>Patient 6:</b> isolate 2                                | RIF-mono              | L4      | C435R                                                                                         | deleterious<br>-3.53                                                                                     | 1.00                                          | gain                                 |                                                                                                                                                    |                                       |
| Rv3696  | <i>glpK</i> |                                                | (32)  | 1                                                                                            | 5 | 5                               | <b>Patient 12:</b> isolate 1<br>(timepoint 0)              | MDR                   | L2      | W491S<br>V460L<br>T389P<br>M266V<br>G89A                                                      | neutral<br>-2.21<br>neutral<br>-0.98<br>deleterious<br>-3.08<br>neutral<br>-0.22<br>deleterious<br>-5.98 | 0.0166<br>0.0208<br>0.0258<br>0.0321<br>0.020 | loss<br>loss<br>loss<br>loss<br>loss |                                                                                                                                                    |                                       |
| Rv3879c | <i>espK</i> | 3                                              | (28)  | 1                                                                                            | 2 | 1                               | <b>Patient 2:</b> Isol. 2 (C1)                             | INH-mono              | L2      | D86N                                                                                          | neutral -<br>0.86                                                                                        | <i>not indicated</i>                          | gain                                 | ESX-1 secretion-associated protein EspK                                                                                                            | cell wall & cell processes            |
| Rv3879c | <i>espK</i> |                                                | (4)   | 1                                                                                            | 2 | 1                               | <b>Patient_c:</b> isol. 1                                  | MDR                   | L2      | Y543STOP                                                                                      | deleterious<br>-318.82                                                                                   | 0.247                                         | loss                                 |                                                                                                                                                    |                                       |

| Gene    | Alter. name | No. of studies reporting variants in that gene | Study | No. of patients with a variant in that gene /Total no. of isolates available of that patient |          | No. of different variants found | Isolates in which the variant was present                                         | Drug Resistance Level | Lineage | Variant (Amino acid change at codon) | PROVEAN prediction (cut-off - 2.5) | hetero-frequency                     | gain/loss of variant over time | Product & Protein Function (39)                                                                         | Gene function class        |
|---------|-------------|------------------------------------------------|-------|----------------------------------------------------------------------------------------------|----------|---------------------------------|-----------------------------------------------------------------------------------|-----------------------|---------|--------------------------------------|------------------------------------|--------------------------------------|--------------------------------|---------------------------------------------------------------------------------------------------------|----------------------------|
| Rv3879c | <i>espK</i> |                                                | (26)  | 1                                                                                            | 98       | 1                               | <b>Patient 15:</b><br>Lung4: B2<br>Lung5: A2<br>Lung6: B3<br>Liver: C5<br>Eta: C1 | Scpt.                 | L4      | S156S                                | neutral                            | 0.01<br>0.03<br>0.99<br>0.01<br>0.03 | N/A                            |                                                                                                         |                            |
| Rv3910  | <i>mviN</i> | 4                                              | (4)   | 1                                                                                            | 2        | 1                               | <b>Patient C:</b> isolate 2                                                       | MDR                   | L2      | G708G                                | neutral                            | 0.05                                 | gain                           | Probable peptidoglycan biosynthesis protein MviN Essential for cell growth and peptidoglycan synthesis. | cell wall & cell processes |
| Rv3910  | <i>mviN</i> |                                                | (21)  | 1                                                                                            | 2        | 1                               | <b>Patient 15:</b> isolate 1                                                      | Scpt.                 | L4      | P1040P                               | neutral                            | ≥ 0.70                               | loss                           |                                                                                                         |                            |
| Rv3910  | <i>mviN</i> |                                                | (26)  | 2                                                                                            | 70<br>82 | 2                               | <b>Patient 17:</b><br>Lung6: A1,A4                                                | Scpt.                 | L4      | L344L                                | neutral                            | 0.14, 0.08                           | N/A                            |                                                                                                         |                            |
|         |             |                                                |       |                                                                                              |          |                                 | <b>Patient 22:</b><br>Lung1: A1<br>Lung3: B3                                      | Scpt.                 | L4      | T228N                                | deleterious -2.83                  | 1.00<br>0.01                         |                                |                                                                                                         |                            |
| Rv3910  | <i>mviN</i> |                                                | (32)  | 1                                                                                            | 4        | 1                               | <b>Patient 10:</b> isolate 1 (timepoint 0)                                        | MDR                   | L2      | V549A                                | neutral 0.64                       | 0.0172                               | loss                           |                                                                                                         |                            |

Patient and isolate numbering is according to the original publication, except for Casali *et al* (43)

Scpt. = susceptible; MDR = multi-drug resistant; XDR = extensively drug resistant; INH = isoniazid; RIF = rifampicin; STR = streptomycin; Alter. = alternative

## REFERENCES

1. Saunders NJ, Trivedi UH, Thomson ML, Doig C, Laurenson IF, Blaxter ML. 2011. Deep resequencing of serial sputum isolates of *Mycobacterium tuberculosis* during therapeutic failure due to poor compliance reveals stepwise mutation of key resistance genes on an otherwise stable genetic background. *J Infect* 62:212–217.

2. Comas I, Borrell S, Roetzer A, Rose G, Malla B, Kato-Maeda M, Galagan J, Niemann S, Gagneux S. 2012. Whole-genome sequencing of rifampicin-resistant *Mycobacterium tuberculosis* strains identifies compensatory mutations in RNA polymerase genes. *Nat Genet* 44:106–110.
3. Walker TM, Ip CLC, Harrell RH, Evans JT, Kapatai G, Dedicoat MJ, Eyre DW, Wilson DJ, Hawkey PM, Crook DW, Parkhill J, Harris D, Walker AS, Bowden R, Monk P, Smith EG, Peto TEA. 2013. Whole-genome sequencing to delineate *Mycobacterium tuberculosis* outbreaks: a retrospective observational study. *Lancet Infect Dis* 13:137–146.
4. Sun G, Luo T, Yang C, Dong X, Li J, Zhu Y, Zheng H, Tian W, Wang S, Barry CE, Mei J, Gao Q. 2012. Dynamic population changes in *Mycobacterium tuberculosis* during acquisition and fixation of drug resistance in patients. *J Infect Dis* 206:1724–1733.
5. Farhat MR, Shapiro BJ, Kieser KJ, Sultana R, Jacobson KR, Victor TC, Warren RM, Streicher EM, Calver A, Sloutsky A, Kaur D, Posey JE, Plikaytis B, Oggioni MR, Gardy JL, Johnston JC, Rodrigues M, Tang PKC, Kato-Maeda M, Borowsky ML, Muddukrishna B, Kreiswirth BN, Kurepina N, Galagan J, Gagneux S, Birren B, Rubin EJ, Lander ES, Sabeti PC, Murray M. 2013. Genomic analysis identifies targets of convergent positive selection in drug-resistant *Mycobacterium tuberculosis*. *Nat Genet* 45:1183–1189.
6. Bryant JM, Harris SR, Parkhill J, Dawson R, Diacon AH, van Helden P, Pym A, Mahayiddin AA, Chuchottaworn C, Sanne IM, Louw C, Boeree MJ, Hoelscher M, McHugh TD, Bateson ALC, Hunt RD, Mwaigwisya S, Wright L, Gillespie SH, Bentley SD. 2013. Whole-genome sequencing to establish relapse or re-infection with *Mycobacterium tuberculosis*: a retrospective observational study. *Lancet Respir Med* 1:786–792.

7. Clark TG, Mallard K, Coll F, Preston M, Assefa S, Harris D, Ogwang S, Mumbowa F, Kirenga B, O'Sullivan DM, Okwera A, Eisenach KD, Joloba M, Bentley SD, Ellner JJ, Parkhill J, Jones-López EC, McNerney R. 2013. Elucidating emergence and transmission of multidrug-resistant tuberculosis in treatment experienced patients by whole genome sequencing. *PloS One* 8:e83012.
8. Merker M, Kohl TA, Roetzer A, Truebe L, Richter E, Rüsç-Gerdes S, Fattorini L, Oggioni MR, Cox H, Varaine F, Niemann S. 2013. Whole genome sequencing reveals complex evolution patterns of multidrug-resistant *Mycobacterium tuberculosis* Beijing strains in patients. *PloS One* 8:e82551.
9. Pérez-Lago L, Comas I, Navarro Y, González-Candelas F, Herranz M, Bouza E, García-de-Viedma D. 2014. Whole genome sequencing analysis of inpatient microevolution in *Mycobacterium tuberculosis*: potential impact on the inference of tuberculosis transmission. *J Infect Dis* 209:98–108.
10. Eldholm V, Norheim G, von der Lippe B, Kinander W, Dahle UR, Caugant DA, Mannsåker T, Mengshoel AT, Dyrhol-Riise AM, Balloux F. 2014. Evolution of extensively drug-resistant *Mycobacterium tuberculosis* from a susceptible ancestor in a single patient. *Genome Biol* 15:490.
11. Guerra-Assunção JA, Houben RMGJ, Crampin AC, Mzembe T, Mallard K, Coll F, Khan P, Banda L, Chiwaya A, Pereira RPA, McNerney R, Harris D, Parkhill J, Clark TG, Glynn JR. 2015. Recurrence due to Relapse or Reinfection With *Mycobacterium tuberculosis* : A Whole-Genome Sequencing Approach in a Large, Population-Based Cohort With a High HIV Infection Prevalence and Active Follow-up. *J Infect Dis* 211:1154–1163.

12. Witney AA, Gould KA, Arnold A, Coleman D, Delgado R, Dhillon J, Pond MJ, Pope CF, Planche TD, Stoker NG, Cosgrove CA, Butcher PD, Harrison TS, Hinds J. 2015. Clinical application of whole-genome sequencing to inform treatment for multidrug-resistant tuberculosis cases. *J Clin Microbiol* 53:1473–1483.
13. Guerra-Assunção JA, Crampin AC, Houben RMGJ, Mzembe T, Mallard K, Coll F, Khan P, Banda L, Chiwaya A, Pereira RPA, McNerney R, Fine PEM, Parkhill J, Clark TG, Glynn JR. 2015. Large-scale whole genome sequencing of *M. tuberculosis* provides insights into transmission in a high prevalence area. *eLife* 4.
14. Black PA, de Vos M, Louw GE, van der Merwe RG, Dippenaar A, Streicher EM, Abdallah AM, Sampson SL, Victor TC, Dolby T, Simpson JA, van Helden PD, Warren RM, Pain A. 2015. Whole genome sequencing reveals genomic heterogeneity and antibiotic purification in *Mycobacterium tuberculosis* isolates. *BMC Genomics* 16:857.
15. O’Neill MB, Mortimer TD, Pepperell CS. 2015. Diversity of *Mycobacterium tuberculosis* across Evolutionary Scales. *PLoS Pathog* 11:e1005257.
16. Stinear TP, Denholm J, Globan M, Leslie D, Seemann T, Meumann EM, Porter JL, Fyfe JAM. 2015. Genome sequence comparisons of serial multi-drug-resistant *Mycobacterium tuberculosis* isolates over 21 years of infection in a single patient. *Microb Genomics* 1.

17. Pérez-Lago L, Navarro Y, Montilla P, Comas I, Herranz M, Rodríguez-Gallego C, Ruiz Serrano MJ, Bouza E, García de Viedma D. 2015. Persistent Infection by a Mycobacterium tuberculosis Strain That Was Theorized To Have Advantageous Properties, as It Was Responsible for a Massive Outbreak. *J Clin Microbiol* 53:3423–3429.
18. Bloemberg GV, Keller PM, Stucki D, Stuckia D, Trauner A, Borrell S, Latshang T, Coscolla M, Rothe T, Hömke R, Ritter C, Feldmann J, Schulthess B, Gagneux S, Böttger EC. 2015. Acquired Resistance to Bedaquiline and Delamanid in Therapy for Tuberculosis. *N Engl J Med* 373:1986–1988.
19. Liu Q, Via LE, Luo T, Liang L, Liu X, Wu S, Shen Q, Wei W, Ruan X, Yuan X, Zhang G, Barry CE, Gao Q. 2015. Within patient microevolution of Mycobacterium tuberculosis correlates with heterogeneous responses to treatment. *Sci Rep* 5:17507.
20. Silva Feliciano C, Rodrigues Praça J, Peronni K, Araújo Silva W, Roberto Bollela V. 2016. Evaluation of resistance acquisition during tuberculosis treatment using whole genome sequencing. *Braz J Infect Dis Off Publ Braz Soc Infect Dis* 20:290–293.
21. Korhonen V, Smit PW, Haanperä M, Casali N, Ruutu P, Vasankari T, Soini H. 2016. Whole genome analysis of Mycobacterium tuberculosis isolates from recurrent episodes of tuberculosis, Finland, 1995-2013. *Clin Microbiol Infect Off Publ Eur Soc Clin Microbiol Infect Dis* 22:549–554.

22. Faksri K, Tan JH, Disratthakit A, Xia E, Prammananan T, Suriyaphol P, Khor CC, Teo Y-Y, Ong RT-H, Chaiprasert A. 2016. Whole-Genome Sequencing Analysis of Serially Isolated Multi-Drug and Extensively Drug Resistant Mycobacterium tuberculosis from Thai Patients. *PloS One* 11:e0160992.
23. Ssengooba W, de Jong BC, Joloba ML, Cobelens FG, Meehan CJ. 2016. Whole genome sequencing reveals mycobacterial microevolution among concurrent isolates from sputum and blood in HIV infected TB patients. *BMC Infect Dis* 16.
24. Zhang D, Gomez JE, Chien J-Y, Haseley N, Desjardins CA, Earl AM, Hsueh P-R, Hung DT. 2016. Genomic analysis of the evolution of fluoroquinolone resistance in Mycobacterium tuberculosis prior to tuberculosis diagnosis. *Antimicrob Agents Chemother*.
25. Casali N, Broda A, Harris SR, Parkhill J, Brown T, Drobniewski F. 2016. Whole Genome Sequence Analysis of a Large Isoniazid-Resistant Tuberculosis Outbreak in London: A Retrospective Observational Study. *PLOS Med* 13:e1002137.
26. Lieberman TD, Wilson D, Misra R, Xiong LL, Moodley P, Cohen T, Kishony R. 2016. Genomic diversity in autopsy samples reveals within-host dissemination of HIV-associated Mycobacterium tuberculosis. *Nat Med*.
27. Wollenberg KR, Desjardins CA, Zalutskaya A, Slodovnikova V, Oler AJ, Quiñones M, Abeel T, Chapman SB, Tartakovsky M, Gabrielian A, Hoffner S, Skrahin A, Birren BW, Rosenthal A, Skrahina A, Earl AM. 2016. Whole genome sequencing of Mycobacterium tuberculosis provides insight into the evolution and genetic composition of drug-resistant tuberculosis in Belarus. *J Clin Microbiol* JCM.02116-16.

28. Datta G, Nieto LM, Davidson RM, Mehaffy C, Pederson C, Dobos KM, Strong M. 2016. Longitudinal whole genome analysis of pre and post drug treatment *Mycobacterium tuberculosis* isolates reveals progressive steps to drug resistance. *Tuberc Edinb Scotl* 98:50–55.
29. Manson AL, Abeel T, Galagan JE, Sundaramurthi JC, Salazar A, Gehrmann T, Shanmugam SK, Palaniyandi K, Narayanan S, Swaminathan S, Earl AM. 2017. *Mycobacterium tuberculosis* Whole Genome Sequences From Southern India Suggest Novel Resistance Mechanisms and the Need for Region-Specific Diagnostics. *Clin Infect Dis* 64:1494–1501.
30. Dheda K, Limberis JD, Pietersen E, Phelan J, Esmail A, Lesosky M, Fennelly KP, Te Riele J, Mastrapa B, Streicher EM, Dolby T, Abdallah AM, Ben-Rached F, Simpson J, Smith L, Gumbo T, van Helden P, Sirgel FA, McNerney R, Theron G, Pain A, Clark TG, Warren RM. 2017. Outcomes, infectiousness, and transmission dynamics of patients with extensively drug-resistant tuberculosis and home-discharged patients with programmatically incurable tuberculosis: a prospective cohort study. *Lancet Respir Med*.
31. Witney AA, Bateson ALE, Jindani A, Phillips PPJ, Coleman D, Stoker NG, Butcher PD, McHugh TD, RIFAQUIN Study Team. 2017. Use of whole-genome sequencing to distinguish relapse from reinfection in a completed tuberculosis clinical trial. *BMC Med* 15:71.
32. Trauner A, Liu Q, Via LE, Liu X, Ruan X, Liang L, Shi H, Chen Y, Wang Z, Liang R, Zhang W, Wei W, Gao J, Sun G, Brites D, England K, Zhang G, Gagneux S, Barry CE, Gao Q. 2017. The within-host population dynamics of *Mycobacterium tuberculosis* vary with treatment efficacy. *Genome Biol* 18:71.



33. Navarro Y, Pérez-Lago L, Herranz M, Sierra O, Comas I, Sicilia J, Bouza E, García de Viedma D. 2017. In-Depth Characterization and Functional Analysis of Clonal Variants in a *Mycobacterium tuberculosis* Strain Prone to Microevolution. *Front Microbiol* 8:694.
34. Nsofor CA, Jiang Q, Wu J, Gan M, Liu Q, Zuo T, Zhu G, Gao Q. 2017. Transmission is a Noticeable Cause of Resistance Among Treated Tuberculosis Patients in Shanghai, China. *Sci Rep* 7:7691.
35. Senghore M, Otu J, Witney A, Gehre F, Doughty EL, Kay GL, Butcher P, Salako K, Kehinde A, Onyejebu N, Idigbe E, Corrah T, de Jong B, Pallen MJ, Antonio M. 2017. Whole-genome sequencing illuminates the evolution and spread of multidrug-resistant tuberculosis in Southwest Nigeria. *PloS One* 12:e0184510.
36. Leung KS-S, Siu GK-H, Tam KK-G, To SW-C, Rajwani R, Ho P-L, Wong SS-Y, Zhao WW, Ma OC-K, Yam W-C. 2017. Comparative Genomic Analysis of Two Clonally Related Multidrug Resistant *Mycobacterium tuberculosis* by Single Molecule Real Time Sequencing. *Front Cell Infect Microbiol* 7:478.
37. Herranz M, Pole I, Ozere I, Chiner-Oms Á, Martínez-Lirola M, Pérez-García F, Gijón P, Serrano MJR, Romero LC, Cuevas O, Comas I, Bouza E, Pérez-Lago L, García-de-Viedma D. 2017. *Mycobacterium tuberculosis* Acquires Limited Genetic Diversity in Prolonged Infections, Reactivations and Transmissions Involving Multiple Hosts. *Front Microbiol* 8:2661.

38. Dheda K, Lenders L, Magomedze G, Srivastava S, Raj P, Arning E, Ashcraft P, Bottiglieri T, Wainwright H, Pennel T, Linegar A, Moodley L, Pooran A, Pasipanodya JG, Sirgel FA, van Helden PD, Wakeland E, Warren RM, Gumbo T. 2018. Drug Penetration Gradients Associated with Acquired Drug Resistance in Tuberculosis Patients. *Am J Respir Crit Care Med*.
39. Kapopoulou A, Lew JM, Cole ST. 2011. The MycoBrowser portal: a comprehensive and manually annotated resource for mycobacterial genomes. *Tuberc Edinb Scotl* 91:8–13.
40. Coll F, McNerney R, Guerra-Assunção JA, Glynn JR, Perdigão J, Viveiros M, Portugal I, Pain A, Martin N, Clark TG. 2014. A robust SNP barcode for typing *Mycobacterium tuberculosis* complex strains. *Nat Commun* 5:4812.
41. Miotto P, Tessema B, Tagliani E, Chindelevitch L, Starks AM, Emerson C, Hanna D, Kim PS, Liwski R, Zignol M, Gilpin C, Niemann S, Denkinger CM, Fleming J, Warren RM, Crook D, Posey J, Gagneux S, Hoffner S, Rodrigues C, Comas I, Engelthaler DM, Murray M, Alland D, Rigouts L, Lange C, Dheda K, Hasan R, Ranganathan UDK, McNerney R, Ezewudo M, Cirillo DM, Schito M, Köser CU, Rodwell TC. 2017. A standardised method for interpreting the association between mutations and phenotypic drug resistance in *Mycobacterium tuberculosis*. *Eur Respir J* 50.
